# Supplementary material for: Oxidative stress changes interactions between 2 bacterial species from competitive to facilitative
Source: PubMed Central journal article supplement (PMC10881020; doi:10.1371/journal.pbio.3002482), 2024-02-05

Adj R2 = 0.99253 Intercept = 0.0054018 Slope = 0.0018524 P = 4.2123e-25

Blank-subtracted absorbance at 532 nm

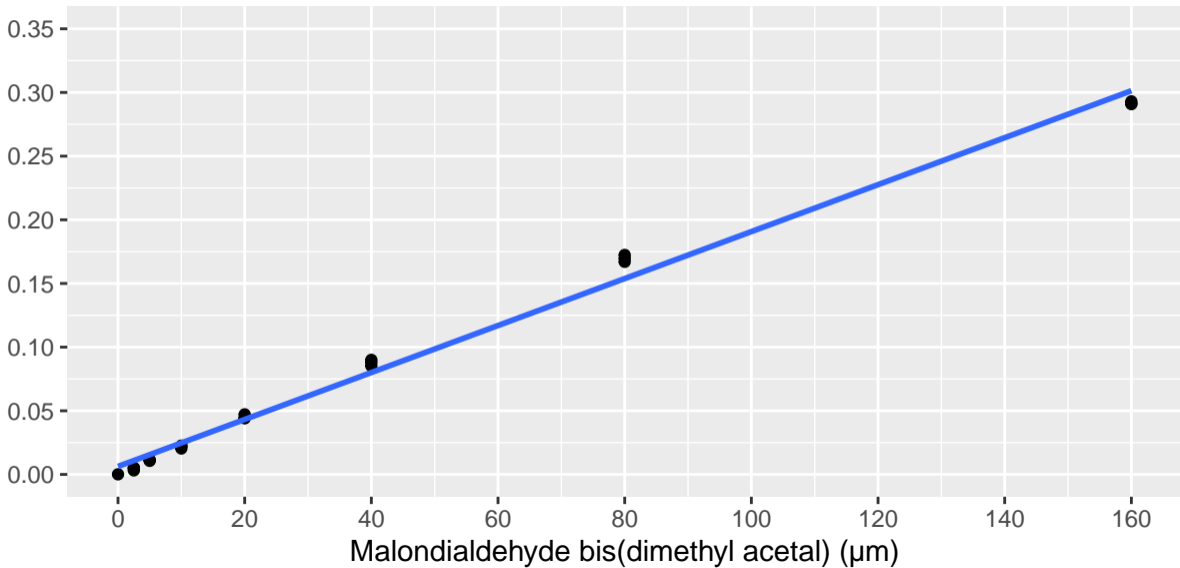

Supplement: pbio.3002482.s006.pdf [file pbio.3002482.s006.pdf]
