# Supplementary material for: Oxidative stress changes interactions between 2 bacterial species from competitive to facilitative
Source: PubMed Central journal article supplement (PMC10881020; doi:10.1371/journal.pbio.3002482), 2024-02-05

**A** Fitting At growth in mono-culture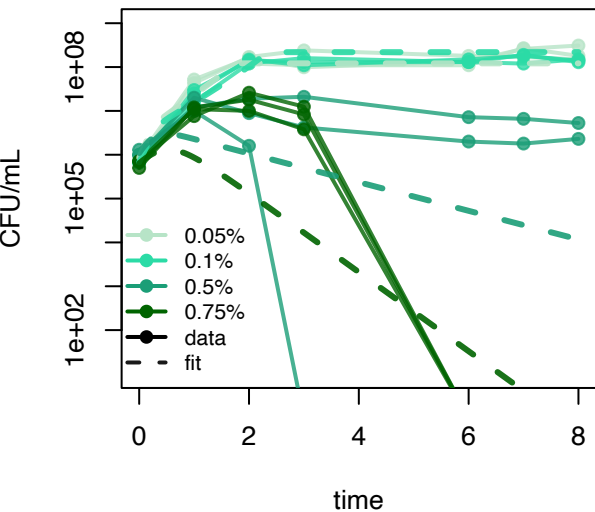**B** Fitting Ct growth in mono-culture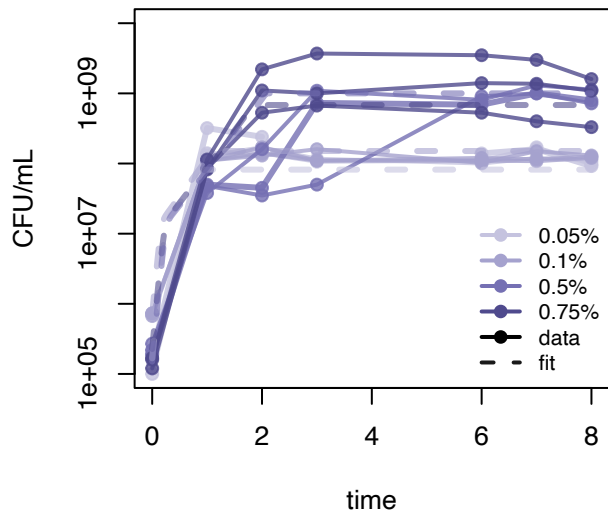**C** Co-cultures at 0.1%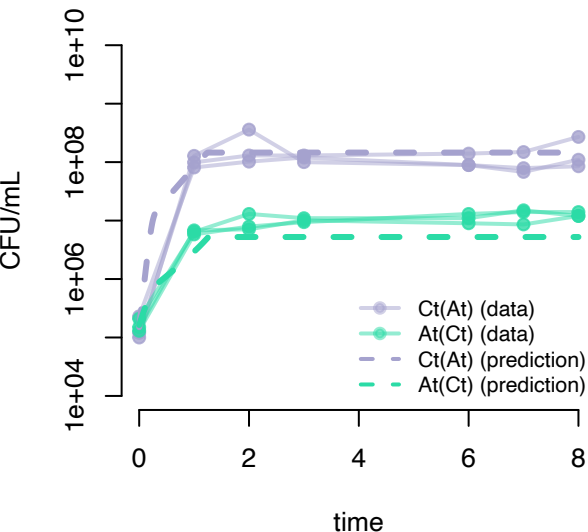**D** Co-cultures at 0.75%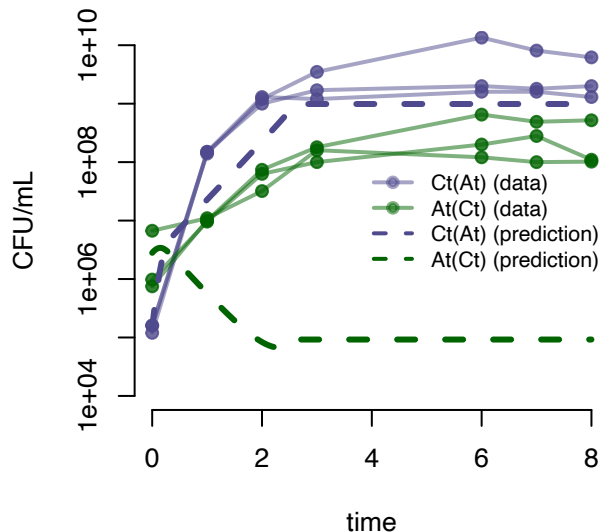

Supplement: pbio.3002482.s007.pdf [file pbio.3002482.s007.pdf]
