# Supplementary material for: Oxidative stress changes interactions between 2 bacterial species from competitive to facilitative
Source: PubMed Central journal article supplement (PMC10881020; doi:10.1371/journal.pbio.3002482), 2024-02-05

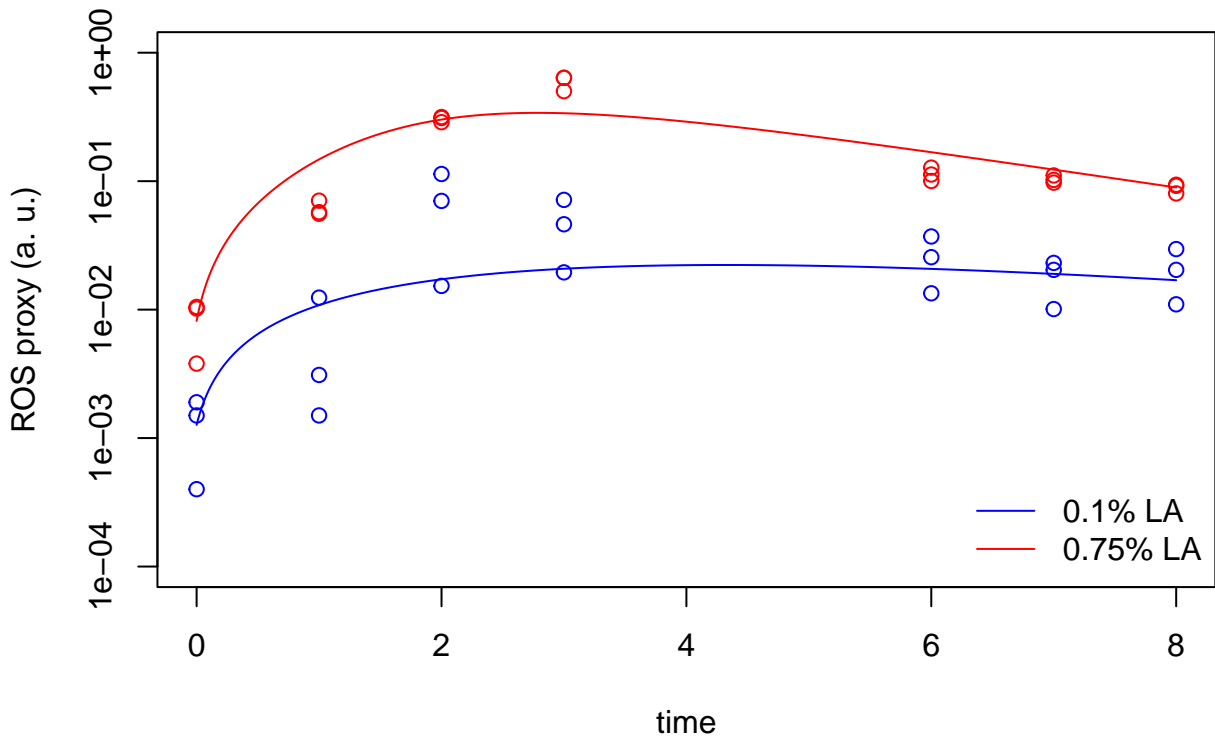

Supplement: pbio.3002482.s008.pdf [file pbio.3002482.s008.pdf]
