# Supplementary material for: Oxidative stress changes interactions between 2 bacterial species from competitive to facilitative
Source: PubMed Central journal article supplement (PMC10881020; doi:10.1371/journal.pbio.3002482), 2024-02-05
Supplement: pbio.3002482.s011.pdf [file pbio.3002482.s011.pdf]

## S1 Table

| Enzyme family                          | Gene names                      | Annotated genes in <i>At</i><br>str. MWF001 | Annotated genes in <i>Ct</i><br>str. MWF001 |
|----------------------------------------|---------------------------------|---------------------------------------------|---------------------------------------------|
| Superoxide dismutases                  | SodA, SodM                      | SodB (3)                                    | SodB (2)                                    |
| Catalases                              | KatA, KatE, KatG                | KatG (1)                                    | KatG (1)                                    |
| Thiol peroxidase,<br>thioredoxins      | TpxD, TlpA, Etrx,<br>TrxA, TrxB | TlpA (1), TrxA, TrxB (2),<br>TrxC           | TrxA (4), TrxC                              |
| Peroxiredoxin                          | AhpC, AhpD, Bcp                 | AhpC, AhpD, Bcp (2)                         | AhpC, AhpF, BcpB, Bcp                       |
| Glutathione reductase,<br>glutaredoxin | gor, grxA                       | grxC, grxD                                  | grxC, grxD                                  |

**ROS resistance genes in *At* and *Ct*.** We searched for a list of putative ROS-degrading enzymes from a recent review paper [57] by searching the annotated genes of our two strains. We show the gene families listed in [57], and whether we found genes of the same family in our two genomes with gene number shown in brackets. This analysis shows that gene presence/absence tells us little about which of the two strains is more resistant to ROS.
