# Supplementary material for: Oxidative stress changes interactions between 2 bacterial species from competitive to facilitative
Source: PubMed Central journal article supplement (PMC10881020; doi:10.1371/journal.pbio.3002482), 2024-02-05
Supplement: pbio.3002482.s012.pdf [file pbio.3002482.s012.pdf]

## S2 Table

| Symbol     | Unit                                 | Description                                                                | Model 1                | Model 2              |
|------------|--------------------------------------|----------------------------------------------------------------------------|------------------------|----------------------|
| $B$        | $\text{CFU.mL}^{-1}$                 | CFU concentration ( $At$ or $Ct$ ),<br>proxy for bacterial population size |                        |                      |
| $C$        | $\text{au.mL}^{-1}$                  | LA concentration                                                           |                        |                      |
| $N$        | $\text{au.mL}^{-1}$                  | unknown MM nutrient concentration                                          |                        |                      |
| $R$        | $\text{au.mL}^{-1}$                  | ROS concentration (proxy)                                                  |                        |                      |
| $r_{N1}$   | $\text{day}^{-1}$                    | maximum growth rate of $Ct$ in MM                                          | 346.53                 | 5.51                 |
| $r_{N2}$   | $\text{day}^{-1}$                    | maximum growth rate of $At$ in MM                                          | 891.43                 | 126.46               |
| $r_{C1}$   | $\text{day}^{-1}$                    | maximum growth rate of $Ct$ in LA                                          | 2.38                   | 3.49                 |
| $r_{C2}$   | $\text{day}^{-1}$                    | maximum growth rate of $At$ in LA                                          | 1.94                   | 2.37                 |
| $K_{N1}$   | $\text{au.mL}^{-1}$                  | half-saturation constant ( $Ct$ in MM)                                     | 0.1                    | 0.001                |
| $K_{N2}$   | $\text{au.mL}^{-1}$                  | half-saturation constant ( $At$ in MM)                                     | 1.01                   | 0.36                 |
| $K_{C1}$   | $\text{au.mL}^{-1}$                  | half-saturation constant ( $Ct$ in LA)                                     | 0.0006                 | 0.04                 |
| $K_{C2}$   | $\text{au.mL}^{-1}$                  | half-saturation constant ( $At$ in LA)                                     | 0.001                  | 0.05                 |
| $Y_{N1}$   | $\text{CFU.au}^{-1}$                 | yield ( $Ct$ in MM)                                                        | $1.28 \times 10^9$     | $4,08 \times 10^8$   |
| $Y_{N2}$   | $\text{CFU.au}^{-1}$                 | yield ( $At$ in MM)                                                        | $3.14 \times 10^8$     | $3.27 \times 10^8$   |
| $Y_{C1}$   | $\text{CFU.au}^{-1}$                 | yield ( $Ct$ in LA)                                                        | $1.38 \times 10^9$     | $5.79 \times 10^9$   |
| $Y_{C2}$   | $\text{CFU.au}^{-1}$                 | yield ( $At$ in LA)                                                        | $2.383 \times 10^9$    | $10^{10}$            |
| $\beta_1$  | $\text{mL.au}^{-1}.\text{day}^{-1}$  | toxicity for $Ct$ (LA in model 1, ROS in model 2)                          | 0.3                    | 8.58                 |
| $\beta_2$  | $\text{mL.au}^{-1}.\text{day}^{-1}$  | toxicity for $At$ (LA in model 1, ROS in model 2)                          | 3.36                   | 20.03                |
| $\gamma_1$ | $\text{mL.au}^{-1}.\text{day}^{-2}$  | toxicity accumulation of LA (model 1)                                      | $3.014 \times 10^{-6}$ |                      |
| $\gamma_2$ | $\text{mL.au}^{-1}.\text{day}^{-2}$  | toxicity accumulation of LA (model 1)                                      | 0.563                  |                      |
| $\alpha_1$ | $\text{mL.CFU}^{-1}.\text{day}^{-1}$ | rate of ROS detoxification by $Ct$ (model 2)                               |                        | $4.6 \times 10^{-6}$ |
| $\alpha_2$ | $\text{mL.CFU}^{-1}.\text{day}^{-1}$ | rate of ROS detoxification by $At$ (model 2)                               |                        | 0                    |
| $d$        | $\text{day}^{-1}$                    | rate of LA oxidation (model 2)                                             |                        | 0.11                 |
| $l$        | $\text{day}^{-1}$                    | rate of ROS decay (model 2)                                                |                        | 0.35                 |
| $e$        | $\text{mL.au}^{-1}.\text{day}^{-1}$  | ROS-triggered LA oxidation (model 2)                                       |                        | 1.94                 |
| $m$        | no unit                              | LA to ROS conversion factor (model 2)                                      |                        | 0.88                 |

**Description of state variables and parameters used in the two models, with the estimates from fitting on mono-cultures.** The compounds (LA, ROS, minimal medium nutrient) concentration unit is arbitrary (au).
