# Supplementary material for: Oxidative stress changes interactions between 2 bacterial species from competitive to facilitative
Source: PubMed Central journal article supplement (PMC10881020; doi:10.1371/journal.pbio.3002482), 2024-02-05
Supplement: pbio.3002482.s013.pdf [file pbio.3002482.s013.pdf]

### S3 Table

| Model                                             | Mono-culture fit error | Co-culture prediction error |
|---------------------------------------------------|------------------------|-----------------------------|
| Model 1                                           | 189.7                  | 483.0                       |
| Model 2                                           | 656.0                  | 126.8                       |
| Model 1 (no toxicity accumulation, $\gamma = 0$ ) | 258.43                 | 916.8                       |
| Model 2 (linear ROS dynamics, $e = 0$ )           | 693.6                  | 272.9                       |

**Sum of squared-errors between the model and the data for the different models.** We compute the squared errors (in  $\log_{10}$ ) between the model ODE simulations and the data points to get a proxy for the goodness of the fit. We sum the errors for *At* and *Ct* growth at 0.1% and 0.75% LA to obtain a global goodness-of-fit proxy: for instance, the goodness-of-fit of model 1 is 189.7. Two goodness-of-fit measures are considered: goodness-of-fit which is calculated using the mono-culture data and goodness-of-prediction which is calculated using the co-culture data. Model 1 and model 2 are the models presented in the main text (implicit toxicity, and ROS-driven toxicity, respectively). Model 1 with no toxicity accumulation and model 2 with linear ROS dynamics are simpler versions of these models in which we ignore non-trivial dynamics such as the positive feedback loop in ROS generation ( $e = 0$ ), and the accumulation of toxicity over time in model 1 ( $\gamma = 0$ ). Model 1 has better goodness-of-fit measures for the mono-culture growth compared to model 2 - this comparison must be taken with caution since model 2 also fits the ROS dynamics at the same time, and only uses 2 LA conditions where in model 1, 4 concentrations of LA were used to fit the mono-cultures. In terms of predicting the co-culture dynamics, model 2 with non-linear ROS dynamics provides the most accurate prediction for the co-culture data.
